# Supplementary material for: Calculation-tunable electronic and optical properties of an InS/GaTe heterojunction based on first principles
Source: Royal Society of Chemistry journal article supplement (doi:10.1039/d4nj01047g), 2024-01-01
Supplement: d4nj01047g1.pdf [file d4nj01047g1.pdf]

## Supplementary Material

### Calculations tunable electronic and optical properties of InS/GaTe heterojunction based on first principles

Mengya Li,<sup>a</sup> Kanghao Liang,<sup>a</sup> Xing Wei,<sup>a</sup> Yan Zhang,<sup>a</sup> Huaxin Chen,

<sup>a</sup> Yun Yang,<sup>a</sup> Jian Liu,<sup>b</sup> Ye Tian,<sup>c</sup> Ziyuan Li,<sup>a</sup> Li Duan<sup>a\*</sup>

*a* School of Materials Science and Engineering, Chang'an University, Xi'an, 710064,  
China

*b* School of Physics, Shandong University, Jinan 250100, China

*c* Institute of Physics, Chinese Academy of Sciences, Beijing 100190, China

\*Corresponding author.

E-mail address: [liduan@chd.edu.cn](mailto:liduan@chd.edu.cn)

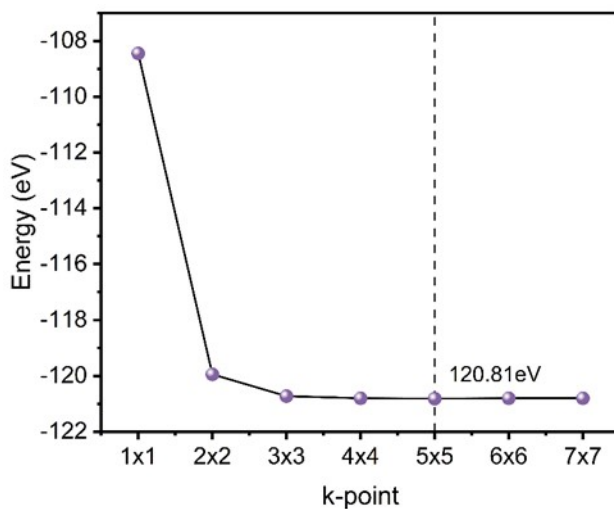

**Fig.S1** shows the convergence test of a k-point selection of heterostructure.

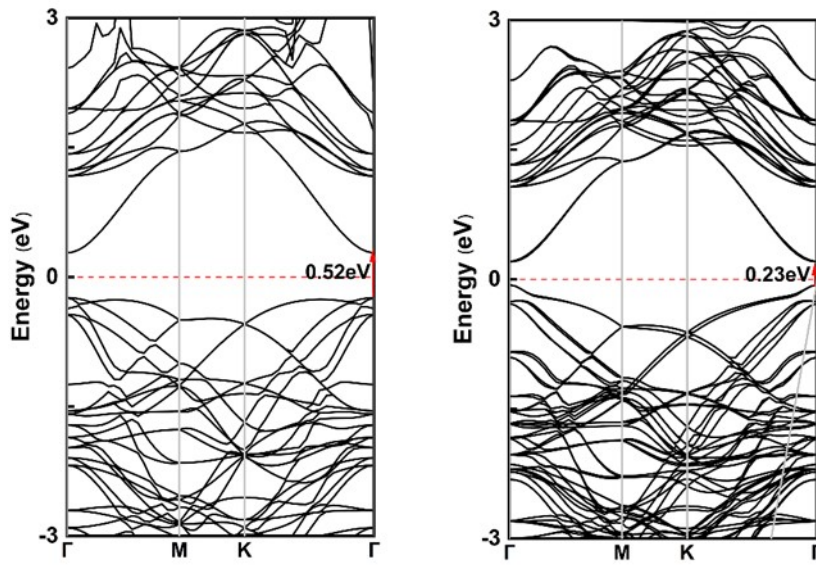

**Fig. S2** Band structure of InS/GaTe heterojunction with the (a) projected energy band diagrams and (b) spin-orbit coupling calculated
